# Supplementary material for: Insights into the pre-initiation events of bacteriophage φ6 RNA-dependent RNA polymerase: towards the assembly of a productive binary complex
Source: PubMed Central journal article supplement — Nucleic Acids Res. 2009 Jan 7;37(4):1182–92. doi: 10.1093/nar/gkn1035 (PMC2651803; doi:10.1093/nar/gkn1035), 2009-01-07
Supplement: gkn1035_1.pdf [file gkn1035_1.pdf]

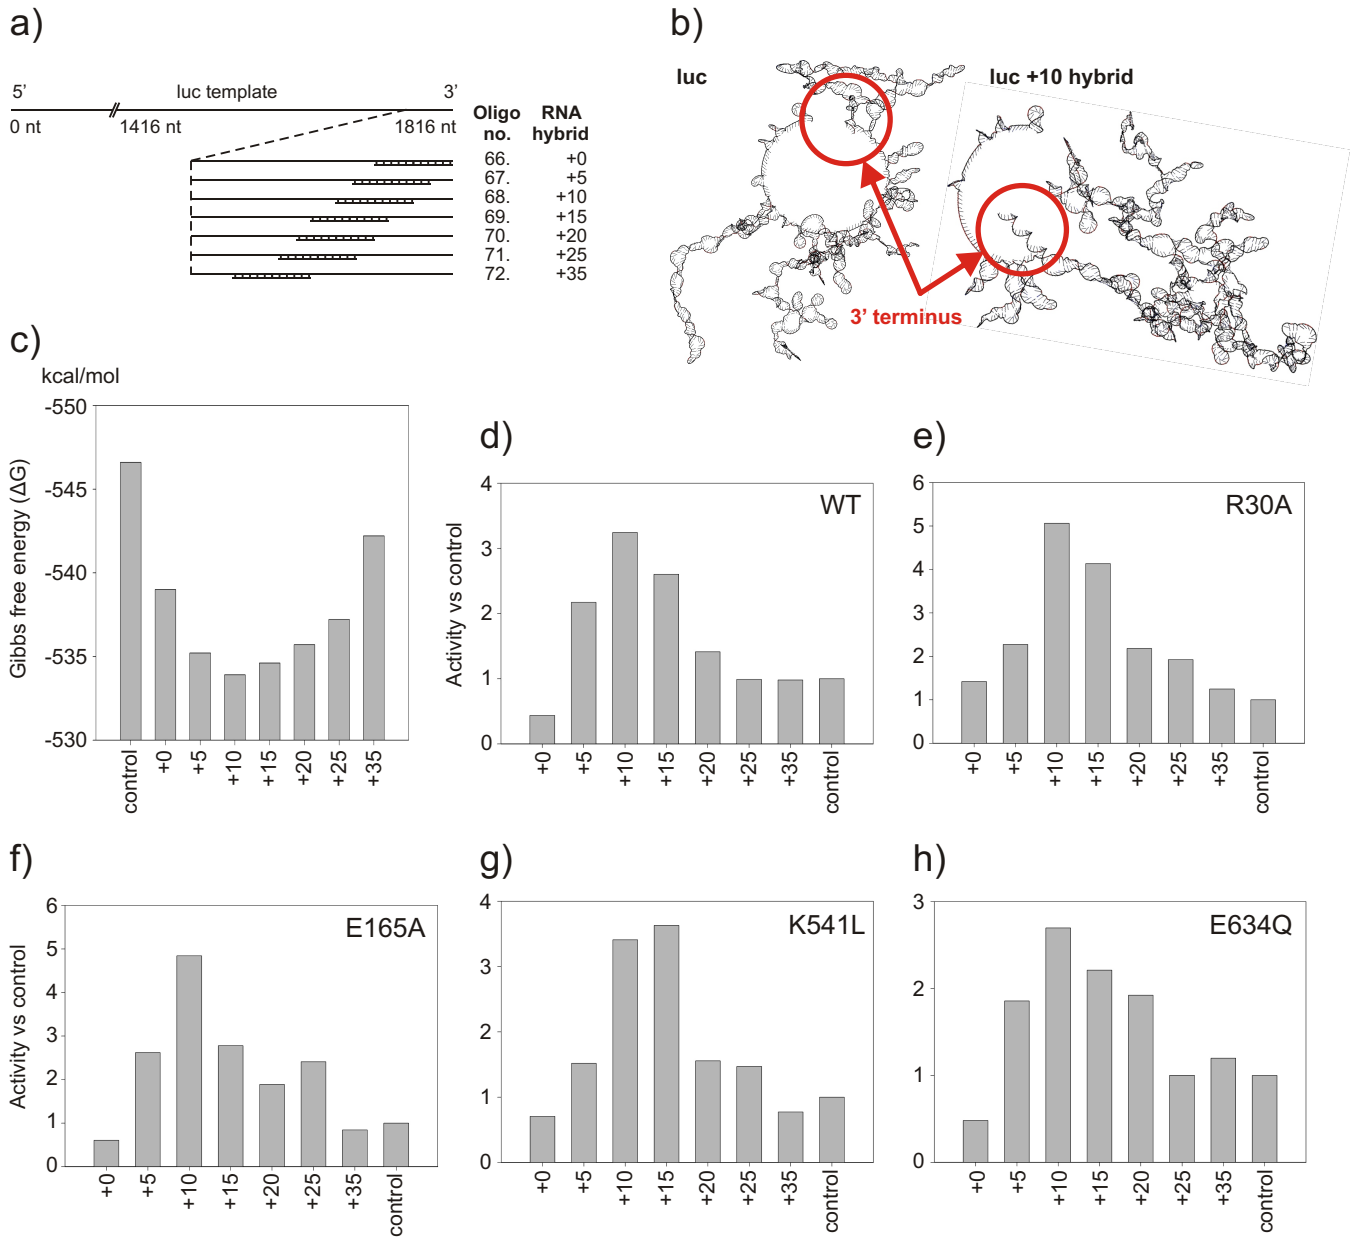

## Supplementary Figure 1

- Schematic representation of the luc ssRNA and a close-up view of the +0 to +35 hybrids following annealing of the complementary RNA oligonucleotides 66 to 72 to the luc ssRNA.
- Predicted global fold of the luc ssRNA and luc +10 hybrid at reaction conditions (3' terminus encircled).
- Changes in Gibbs free energy ( $\Delta G$ ) of the luc RNA hybrids as a function of the complementary oligonucleotide location.
- RNA polymerization activity of WT  $\phi 6$  RdRP (d), R30A mutant (e), E165A mutant (f), K541L mutant (g) and E634Q mutant (h) using different luc RNA hybrids. The results have been normalized against an internal control (polymerization activity with the luc ssRNA template).
