# Supplementary material for: Insights into the pre-initiation events of bacteriophage φ6 RNA-dependent RNA polymerase: towards the assembly of a productive binary complex
Source: PubMed Central journal article supplement — Nucleic Acids Res. 2009 Jan 7;37(4):1182–92. doi: 10.1093/nar/gkn1035 (PMC2651803; doi:10.1093/nar/gkn1035), 2009-01-07
Supplement: gkn1035_2.pdf [file gkn1035_2.pdf]

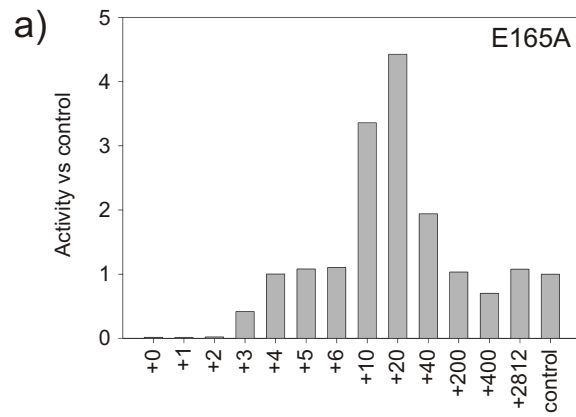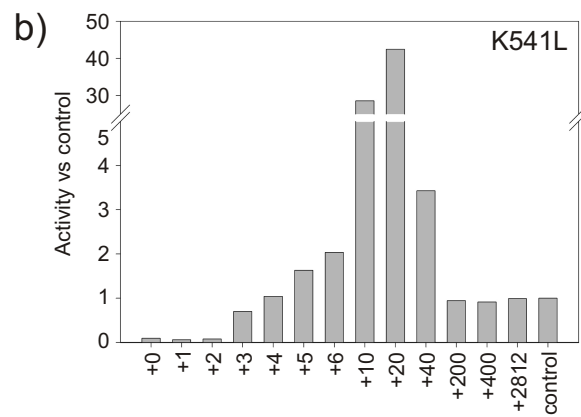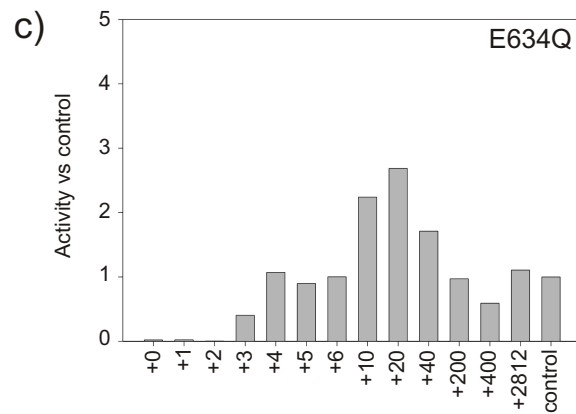

## Supplementary Figure 2

RNA polymerization activity with s<sup>+</sup> RNA hybrids

a-c) RNA polymerization activity of E165A mutant (a), K541L mutant (b) and E634Q mutant (c), using different s<sup>+</sup> RNA hybrids. The results have been normalized against an internal control (polymerization activity with the s<sup>+</sup> ssRNA template).
