# Supplementary material for: Insights into the pre-initiation events of bacteriophage φ6 RNA-dependent RNA polymerase: towards the assembly of a productive binary complex
Source: PubMed Central journal article supplement — Nucleic Acids Res. 2009 Jan 7;37(4):1182–92. doi: 10.1093/nar/gkn1035 (PMC2651803; doi:10.1093/nar/gkn1035), 2009-01-07
Supplement: gkn1035_3.pdf [file gkn1035_3.pdf]

**Supplementary Table 1: Initial screening of the  $\phi$ 6 RdRP mutants**

| Plasmid <sup>o</sup> | Mutation | Mutation site              | Initial selection <sup>†</sup> |                  |              |                     |
|----------------------|----------|----------------------------|--------------------------------|------------------|--------------|---------------------|
|                      |          |                            | Clone obtained                 | Expression level | Purification | Polymerase activity |
| -                    | E172Q    | plough                     | -                              |                  |              |                     |
| -                    | R291S    | specificity pocket         | -                              |                  |              |                     |
| -                    | K451A    | specificity pocket         | -                              |                  |              |                     |
| -                    | K627L    | rim of the template tunnel | -                              |                  |              |                     |
| -                    | H642K    | specificity pocket         | -                              |                  |              |                     |
| pNL7#4               | R146L    | rim of the template tunnel | x                              | -                |              |                     |
| pNL6#5               | K147L    | rim of the template tunnel | x                              | -                |              |                     |
| pNL2#3               | E165Q    | plough                     | x                              | -                |              |                     |
| pNL16#1              | K451L    | specificity pocket         | x                              | -                |              |                     |
| pNL11#2              | K627A    | rim of the template tunnel | x                              | -                |              |                     |
| pNL10#2              | E652Q    | plough                     | x                              | -                |              |                     |
| pNL15#1              | L628S    | specificity pocket         | x                              | +                | -            |                     |
| pNL1#1               | M646V    | specificity pocket         | x                              | +                | -            |                     |
| pNL12#5              | E139Q    | plough                     | x                              | +                | +++          | +                   |
| pNL3#3               | E165A    | plough                     | x                              | ++               | +++          | +                   |
| pNL4#7               | E168Q    | plough                     | x                              | +                | +++          | +                   |
| pNL8#7               | K541A    | rim of the template tunnel | x                              | +                | +++          | +                   |
| pNL9#4               | K541L    | rim of the template tunnel | x                              | ++               | +++          | +                   |
| pNL19#1              | R30A     | rim of the template tunnel | x                              | ++               | +++          | ++                  |
| pNL20#1              | R291K    | specificity pocket         | x                              | ++               | +++          | +                   |
| pNL14#1              | T633A    | specificity pocket         | x                              | +                | +++          | +                   |
| pNL13#1              | E634Q    | specificity pocket         | x                              | +                | +++          | ++                  |

<sup>†</sup> Legend: - = no, x = yes, + = poor, ++ = moderate, +++ = good

<sup>o</sup>  $\phi$ 6 RdRP mutants shaded grey were selected for further biochemical characterisation

**Supplementary Table 2: Oligonucleotides used in this study**

| Oligonucleotide           | Sequence (5' – 3')                                                             | Description (ref.) |
|---------------------------|--------------------------------------------------------------------------------|--------------------|
| 1. p2_E139Q_up            | DNA CGGCTTATGTTTTCAGATCTACAGCCGGTACCCTGAAGATCCG                                |                    |
| 2. p2_E139Q_down          | DNA CCGATCTTCAGCGGTACCGGCTGTAGATCTGAAAACATAAGCCG                               |                    |
| 3. p2_E165A_up            | DNA GGAACGAAGATCGCGATCGCCGAGCGCTCTCGAGAAAAGCGG                                 |                    |
| 4. p2_E165A_down          | DNA CCGCTTCTCGAGAGCGCGCTCGGCGATCGCGATCTTCGTTCC                                 |                    |
| 5. p2_E165Q_up            | DNA GGAACGAAGATCCAGATCGCCGAGCGCGCTCTCGAGAAAAGCGG                               |                    |
| 6. p2_E165Q_down          | DNA CCGCTTCTCGAGAGCGCGCTCGGCGATCTGGATCTTCGTTCC                                 |                    |
| 7. p2_E168Q_up            | DNA CGAAGATCGAGATCGCCGAGCGGCTCTCGAGAAAAGCGG                                    |                    |
| 8. p2_E168Q_down          | DNA CCGCTTCTCGAGAGCGCGCTGGGCGATCTCGATCTTCG                                     |                    |
| 9. p2_E172Q_up            | DNA CGCCGAGCGCGCTCTGCAGAAAAGCGGAAGAAGC                                         |                    |
| 10. p2_E172Q_down         | DNA GCTTCTTCCGCTTCTGCAGAGCGCGCTCGGCG                                           |                    |
| 11. p2_E652Q_up           | DNA GGTACTGATGCACGGCGTATCGGTCCAAAAGACTGAGCG                                    |                    |
| 12. p2_E652Q_down         | DNA CGCTCAGTCTTTTGGACCGATACGCCGTGCATCAGTACC                                    |                    |
| 13. p2_R146L_up           | DNA GTTTTCAGATCTCGAGCCTGTTCCGCTGAAGATCCTTAAAGGATCGTC                           |                    |
| 14. p2_R146L_down         | DNA GACGATCCTTTAAGGATCTTCAGCGGAACAGGCTCGAGATCTGAAAAC                           |                    |
| 15. p2_K147L_up           | DNA GTTTTCAGATCTCGAGCCTGTTCCGCTGAAGATCCGCTAGGATCGTC                            |                    |
| 16. p2_K147L_down         | DNA GACGATCCTAGACGGATCTTCAGCGGAACAGGCTCGAGATCTGAAAAC                           |                    |
| 17. p2_K541A_up           | DNA CCAATCGGGCGTACGCGACCGATCTGCGCGCAACCG                                       |                    |
| 18. p2_K541A_down         | DNA CCGTTTGCAGCGATCGGTCGCGTACGCCCGATTGG                                        |                    |
| 19. p2_K541L_up           | DNA CCAATCGGGCGTACGCGACCGATCTCTGCGCAACCG                                       |                    |
| 20. p2_K541L_down         | DNA CCGTTTGCAGCGATCGGTCGCGTACGCCCGATTGG                                        |                    |
| 21. p2_K627A_up           | DNA GTGCTTGCTGACCCGAACGCACTGCAGTATAAGTGGACCG                                   |                    |
| 22. p2_K627A_down         | DNA CGGTCCACTTATACTGCAGTGCCTTCGGGTGAGCAAGCAC                                   |                    |
| 23. p2_K627L_up           | DNA GTGCTTGCTGACCCGAACCTACTGCAGTATAAGTGGACCGAGG                                |                    |
| 24. p2_K627L_down         | DNA CCTCGGTCCACTTATACTGCAGTAGGTTCCGGTGCAGCAAGCAC                               |                    |
| 25. p2_R30A_up            | DNA GCCCAACAAGCCTCGAAGGCTAGCTTCAAAGAGGGGGCGATTGAAACG                           |                    |
| 26. p2_R30A_down          | DNA CGTTTCAATCGCCCCCTCTTTGAAGCTAGCCTTCGAGGCTTGTGGGC                            |                    |
| 27. p2_R291K_up           | DNA GCGCAACCTGTGAAAACAAAATTTATTCGAAGTACGCTTACACC                               |                    |
| 28. p2_R291K_down         | DNA GGTGTAAGCGTACTTCAATAAAATTTGTTTTTTCACAGGTTGCGC                              |                    |
| 29. p2_R291S_up           | DNA GCGCAACCTGTGTCAAACAAAATTTATTCGAAGTACGCTTACACC                              |                    |
| 30. p2_R291S_down         | DNA GGTGTAAGCGTACTTCAATAAAATTTGTTTTGACACAGGTTGCGC                              |                    |
| 31. p2_K451A_up           | DNA GCCAAGCATAGCATCATCAGATGCTGAGATCTGACGGATCTCCTCG                             |                    |
| 32. p2_K451A_down         | DNA GCCAAGCATAGCATCATCAGATGCTGAGATCTGACGGATCTCCTCG                             |                    |
| 33. p2_K451L_up           | DNA GCCAAGCATAGCATCATCAGATGCTGAGATCTGACGGATCTCCTCG                             |                    |
| 34. p2_K451L_down         | DNA CGAGGAGATCCGTCAGATCTCACTATCTGATGATGCTATGCTTGGC                             |                    |
| 35. seq3_p2               | DNA CCAGTTCAGCCCTGAGTACGGTGT                                                   |                    |
| 36. p2_L628S_down         | DNA GCCATGCATCAGTACCTCGTGGATATTCGCCGAGACGTCGGCCTCGGTCCACT-TATACTGGGATTTGTTCCGG |                    |
| 37. p2_T633A_down         | DNA GCCATGCATCAGTACCTCGTGGATATTCGCCGAGACGTCGGCCTCGGCCACT-TATAC                 |                    |
| 38. p2_E634Q_down         | DNA GCCATGCATCAGTACCTCGTGGATATTCGCCGAGACGTCGGCCTGAGTCCACTT                     |                    |
| 39. p2_H642K_down         | DNA GCCATGCATCAGTACTTCTTGATATTCGCCGAGA                                         |                    |
| 40. p2_M646V_down         | DNA GGCCCTAGGCATTACAGAACGAGAAAACCGCTCAGTCTTTTCGACCGATACGC-CATGCACCAGTACCTCGT   |                    |
| 41. T7-1                  | DNA CGCGTAATACGACTCACTATAG                                                     | Upstream (1)       |
| 42. 3'end                 | DNA AGAGAGAGAGCCCCCGA                                                          | Downstream (2)     |
| 43. 3'end_1               | DNA AAGAGAGAGAGCCCCCGA                                                         | Downstream (2)     |
| 44. 3'end_2               | DNA CAGAGAGAGAGCCCCCGA                                                         | Downstream (2)     |
| 45. 3'end_3               | DNA GAGAGAGAGAGCCCCCGA                                                         | Downstream (2)     |
| 46. 3'end_4               | DNA TAGAGAGAGAGCCCCCGA                                                         | Downstream (2)     |
| 47. pT7_3'end             | DNA TAAGCTTGGGCTGCAGGT                                                         | Downstream (2)     |
| 48. pT7_3'end_1           | DNA ATAAGCTTGGGCTGCAGGT                                                        | Downstream (2)     |
| 49. pT7_3'end_2           | DNA CTAAGCTTGGGCTGCAGGT                                                        | Downstream (2)     |
| 50. pT7_3'end_3           | DNA GTAAGCTTGGGCTGCAGGT                                                        | Downstream (2)     |
| 51. pT7_3'end_4           | DNA TTAAGCTTGGGCTGCAGGT                                                        | Downstream (2)     |
| 52. T7-Phi6_2628-2650_fwd | DNA CGCGTAATACGACTCACTATAGGGACACGGAAGTTATTGAAGCAGC                             |                    |
| 53. anti-S_2929-2948      | RNA AGAGAGAGAGCCCCGAAGG                                                        |                    |
| 54. anti-S_2928-2947      | RNA GAGAGAGAGCCCCGAAGGG                                                        |                    |
| 55. anti-S_2927-2946      | RNA AGAGAGAGCCCCGAAGGGG                                                        |                    |
| 56. anti-S_2926-2945      | RNA GAGAGAGCCCCGAAGGGGC                                                        |                    |
| 57. anti-S_2925-2944      | RNA AGAGAGCCCCGAAGGGGCC                                                        |                    |
| 58. anti-S_2924-2943      | RNA GAGAGCCCCGAAGGGGCCG                                                        |                    |
| 59. anti-S_2923-2942      | RNA AGAGCCCCGAAGGGGCCGU                                                        |                    |
| 60. anti-S_2919-2938      | RNA CCCCAGAGGGGCCGUCCUUAU                                                      |                    |
| 61. anti-S_2909-2928      | RNA GCCGUCCUUAUUGGACGCUCA                                                      |                    |
| 62. anti-S_2889-2908      | RNA ACAUAGUGAGUCUCGCCUUG                                                       |                    |
| 63. anti-S_2729-2748      | RNA UAGAUUUCGAUCAGAUCAAG                                                       |                    |
| 64. anti-S_2529-2548      | RNA GAGACUGGCAUUCACAUUC                                                        |                    |

| Oligonucleotide        | Sequence (5' – 3')       | Description (ref.) |
|------------------------|--------------------------|--------------------|
| 65. anti-S_117-136     | RNA CGACUCAUGGACCUUGGGAG |                    |
| 66. anti-luc_1797-1816 | RNA UAAGCUUGGGCUGCAGGUCG |                    |
| 67. anti-luc_1792-1811 | RNA UUGGGCUGCAGGUCGACCUC |                    |
| 68. anti-luc_1787-1806 | RNA CUGCAGGUCGACCUCGAGGC |                    |
| 69. anti-luc_1782-1801 | RNA GGUCGACCUCGAGGCCUCGG |                    |
| 70. anti-luc_1777-1796 | RNA ACCUCGAGGCCUCGGAGGAU |                    |
| 71. anti-luc_1772-1791 | RNA GAGGCCUCGGAGGAUUACAA |                    |
| 72. anti-luc_1762-1781 | RNA AGGAUUACAAUAGCUAAGAA |                    |

1. Makeyev, E. V. and Bamford, D. H. (2000b) The polymerase subunit of a dsRNA virus plays a central role in the regulation of viral RNA metabolism. *EMBO J.*, **19**, 6275-84.
2. Makeyev, E. V. and Bamford, D. H. (2001) Primer-independent RNA sequencing with bacteriophage  $\phi 6$  RNA polymerase and chain terminators. *RNA.*, **7**, 774-81.
